# Supplementary material for: Gender bias and inequity holds women back in their conservation careers
Source: Frontiers journal article supplement (doi:10.3389/fenvs.2022.1056751), 2023-01-24
Supplement: Data_Sheet_1.PDF [file Data_Sheet_1.PDF]

## Supplementary materials (Supplementary Table 1; Figures S1a,b,c)

**Supplementary Table 1:** Results for quantitative survey questions with three-point Likert Scale disaggregated by gender (presented as a percentage of the total of either women or men respondents).

| Gender | Likert Scale               | At TNC, the conservation/science staff in my business unit/program are at least 50% women. | At TNC, I feel that I have an influential role in deciding the research/conservation priorities for my business unit/program. | At TNC, I feel that overall women have an influential role in deciding the research/conservation priorities for my immediate business unit/program. | At TNC, my supervisors regularly share ideas/seek my input when making strategic decisions for my business unit/program. | At TNC, I have enough opportunity to influence science research/conservation priorities for my program/business unit. | At TNC, I have made important contributions to shaping the Shared Conservation Agenda. | At TNC, career/professional development opportunities are equally available to women and men in my team. |
|--------|----------------------------|--------------------------------------------------------------------------------------------|-------------------------------------------------------------------------------------------------------------------------------|-----------------------------------------------------------------------------------------------------------------------------------------------------|--------------------------------------------------------------------------------------------------------------------------|-----------------------------------------------------------------------------------------------------------------------|----------------------------------------------------------------------------------------|----------------------------------------------------------------------------------------------------------|
|        |                            | Q3                                                                                         | Q4                                                                                                                            | Q5                                                                                                                                                  | Q6                                                                                                                       | Q7                                                                                                                    | Q8                                                                                     | Q9                                                                                                       |
| Woman  | Agree                      | 61%                                                                                        | 50%                                                                                                                           | 64%                                                                                                                                                 | 59%                                                                                                                      | 49%                                                                                                                   | 20%                                                                                    | 65%                                                                                                      |
| Woman  | Neither agree nor disagree | 7%                                                                                         | 22%                                                                                                                           | 19%                                                                                                                                                 | 17%                                                                                                                      | 25%                                                                                                                   | 29%                                                                                    | 21%                                                                                                      |
| Woman  | Disagree                   | 32%                                                                                        | 28%                                                                                                                           | 17%                                                                                                                                                 | 24%                                                                                                                      | 25%                                                                                                                   | 50%                                                                                    | 13%                                                                                                      |
| Woman  | Don't Know                 | 0%                                                                                         | 0%                                                                                                                            | 0%                                                                                                                                                  | 0%                                                                                                                       | 0%                                                                                                                    | 0%                                                                                     | 0%                                                                                                       |
| Man    | Agree                      | 63%                                                                                        | 67%                                                                                                                           | 82%                                                                                                                                                 | 72%                                                                                                                      | 65%                                                                                                                   | 32%                                                                                    | 83%                                                                                                      |
| Man    | Neither agree nor disagree | 8%                                                                                         | 17%                                                                                                                           | 13%                                                                                                                                                 | 16%                                                                                                                      | 20%                                                                                                                   | 30%                                                                                    | 13%                                                                                                      |
| Man    | Disagree                   | 29%                                                                                        | 16%                                                                                                                           | 5%                                                                                                                                                  | 12%                                                                                                                      | 15%                                                                                                                   | 37%                                                                                    | 3%                                                                                                       |
| Man    | Don't Know                 | 0%                                                                                         | 0%                                                                                                                            | 0%                                                                                                                                                  | 0%                                                                                                                       | 0%                                                                                                                    | 0%                                                                                     | 0%                                                                                                       |

| Gender | Likert Scale               | At TNC, I am generally aware of opportunities for career enhancement and advancement. | At TNC, I actively pursue opportunities for career enhancement and advancement. | I believe my prospects for career enhancement/ advancement at TNC are good. | At TNC, my supervisor encourages me to apply for more senior roles/ stretch projects. | At TNC, I have a mentor (formal or informal) who helps me develop in my role. | I am satisfied overall with my current role at TNC. | I feel like I am realising my full potential at TNC. |
|--------|----------------------------|---------------------------------------------------------------------------------------|---------------------------------------------------------------------------------|-----------------------------------------------------------------------------|---------------------------------------------------------------------------------------|-------------------------------------------------------------------------------|-----------------------------------------------------|------------------------------------------------------|
|        |                            | Q10                                                                                   | Q11                                                                             | Q12                                                                         | Q13                                                                                   | Q14                                                                           | Q15                                                 | Q16                                                  |
| Woman  | Agree                      | 52%                                                                                   | 64%                                                                             | 43%                                                                         | 38%                                                                                   | 38%                                                                           | 60%                                                 | 34%                                                  |
| Woman  | Neither agree nor disagree | 21%                                                                                   | 23%                                                                             | 29%                                                                         | 33%                                                                                   | 14%                                                                           | 21%                                                 | 28%                                                  |
| Woman  | Disagree                   | 27%                                                                                   | 13%                                                                             | 28%                                                                         | 29%                                                                                   | 48%                                                                           | 18%                                                 | 38%                                                  |
| Woman  | Don't Know                 | 0%                                                                                    | 0%                                                                              | 0%                                                                          | 0%                                                                                    | 0%                                                                            | 0%                                                  | 0%                                                   |
| Man    | Agree                      | 63%                                                                                   | 52%                                                                             | 47%                                                                         | 37%                                                                                   | 35%                                                                           | 70%                                                 | 47%                                                  |
| Man    | Neither agree nor disagree | 22%                                                                                   | 33%                                                                             | 31%                                                                         | 36%                                                                                   | 22%                                                                           | 18%                                                 | 27%                                                  |
| Man    | Disagree                   | 15%                                                                                   | 15%                                                                             | 22%                                                                         | 26%                                                                                   | 43%                                                                           | 12%                                                 | 26%                                                  |
| Man    | Don't Know                 | 0%                                                                                    | 0%                                                                              | 0%                                                                          | 0%                                                                                    | 0%                                                                            | 0%                                                  | 0%                                                   |

| Gender | Likert Scale               | At TNC, women have the same opportunities to advance as men. | At TNC, If I took leave of absence for six months or more to handle a family matter, it would negatively impact my position at work. | I am not achieving everything in my career because of balancing family commitments. | TNC pay policies mean that women have the same opportunities to advance as men. | TNC human resources policies and procedures mean that women have the same opportunities to advance as men. | At TNC, my gender has not influenced me getting a raise, promotion, key assignment, or chance to get ahead. | TNC is doing a good job to improve the role of women in conservation and science. |
|--------|----------------------------|--------------------------------------------------------------|--------------------------------------------------------------------------------------------------------------------------------------|-------------------------------------------------------------------------------------|---------------------------------------------------------------------------------|------------------------------------------------------------------------------------------------------------|-------------------------------------------------------------------------------------------------------------|-----------------------------------------------------------------------------------|
|        |                            | Q17                                                          | Q18                                                                                                                                  | Q19                                                                                 | Q20                                                                             | Q21                                                                                                        | Q22                                                                                                         | Q23                                                                               |
| Woman  | Agree                      | 45%                                                          | 48%                                                                                                                                  | 31%                                                                                 | 32%                                                                             | 48%                                                                                                        | 52%                                                                                                         | 56%                                                                               |
| Woman  | Neither agree nor disagree | 29%                                                          | 32%                                                                                                                                  | 20%                                                                                 | 54%                                                                             | 38%                                                                                                        | 29%                                                                                                         | 34%                                                                               |
| Woman  | Disagree                   | 25%                                                          | 20%                                                                                                                                  | 49%                                                                                 | 14%                                                                             | 13%                                                                                                        | 18%                                                                                                         | 9%                                                                                |
| Woman  | Don't Know                 | 0%                                                           | 0%                                                                                                                                   | 0%                                                                                  | 0%                                                                              | 0%                                                                                                         | 0%                                                                                                          | 0%                                                                                |
| Man    | Agree                      | 78%                                                          | 42%                                                                                                                                  | 28%                                                                                 | 63%                                                                             | 74%                                                                                                        | 71%                                                                                                         | 78%                                                                               |
| Man    | Neither agree nor disagree | 16%                                                          | 32%                                                                                                                                  | 23%                                                                                 | 34%                                                                             | 22%                                                                                                        | 24%                                                                                                         | 21%                                                                               |
| Man    | Disagree                   | 5%                                                           | 26%                                                                                                                                  | 49%                                                                                 | 3%                                                                              | 3%                                                                                                         | 5%                                                                                                          | 1%                                                                                |
| Man    | Don't Know                 | 0%                                                           | 0%                                                                                                                                   | 0%                                                                                  | 0%                                                                              | 0%                                                                                                         | 0%                                                                                                          | 0%                                                                                |

| Gender | Likert Scale               | TNC should be doing more to increase gender equity at all levels at TNC. | I would recommend TNC as a great place to work for women pursuing a career in science and/or conservation. | I think staff in science/ conservation roles at TNC outside the US have significant influence on setting our global conservation/ science priorities for the organisation. | I think women in science/ conservation roles at TNC outside the US have significant influence on setting our global conservation/ science priorities. | I think women from outside the US are well represented in science/ conservation leadership roles in TNC. | I would recommend TNC as a great place to work for women pursuing a leadership position in science and conservation. | BEFORE I came to TNC, my gender played a role in me missing out on a raise, promotion, key assignment, or chance to get ahead. |
|--------|----------------------------|--------------------------------------------------------------------------|------------------------------------------------------------------------------------------------------------|----------------------------------------------------------------------------------------------------------------------------------------------------------------------------|-------------------------------------------------------------------------------------------------------------------------------------------------------|----------------------------------------------------------------------------------------------------------|----------------------------------------------------------------------------------------------------------------------|--------------------------------------------------------------------------------------------------------------------------------|
|        |                            | Q24                                                                      | Q25                                                                                                        | Q26                                                                                                                                                                        | Q27                                                                                                                                                   | Q28                                                                                                      | Q29                                                                                                                  | Q31                                                                                                                            |
| Woman  | Agree                      | 73%                                                                      | 78%                                                                                                        | 20%                                                                                                                                                                        | 14%                                                                                                                                                   | 8%                                                                                                       | 63%                                                                                                                  | 29%                                                                                                                            |
| Woman  | Neither agree nor disagree | 23%                                                                      | 18%                                                                                                        | 27%                                                                                                                                                                        | 0%                                                                                                                                                    | 0%                                                                                                       | 27%                                                                                                                  | 26%                                                                                                                            |
| Woman  | Disagree                   | 4%                                                                       | 4%                                                                                                         | 14%                                                                                                                                                                        | 14%                                                                                                                                                   | 21%                                                                                                      | 11%                                                                                                                  | 46%                                                                                                                            |
| Woman  | Don't Know                 | 0%                                                                       | 0%                                                                                                         | 39%                                                                                                                                                                        | 72%                                                                                                                                                   | 70%                                                                                                      | 0%                                                                                                                   | 0%                                                                                                                             |
| Man    | Agree                      | 50%                                                                      | 91%                                                                                                        | 28%                                                                                                                                                                        | 22%                                                                                                                                                   | 16%                                                                                                      | 85%                                                                                                                  | 4%                                                                                                                             |
| Man    | Neither agree nor disagree | 40%                                                                      | 8%                                                                                                         | 29%                                                                                                                                                                        | 0%                                                                                                                                                    | 0%                                                                                                       | 12%                                                                                                                  | 28%                                                                                                                            |
| Man    | Disagree                   | 10%                                                                      | 1%                                                                                                         | 11%                                                                                                                                                                        | 8%                                                                                                                                                    | 12%                                                                                                      | 2%                                                                                                                   | 67%                                                                                                                            |
| Man    | Don't Know                 | 0%                                                                       | 0%                                                                                                         | 32%                                                                                                                                                                        | 70%                                                                                                                                                   | 71%                                                                                                      | 0%                                                                                                                   | 0%                                                                                                                             |

| Gender | Likert Scale               | At TNC, I feel supported to raise issues of gender bias (intentional or unintentional) without fear of reprisal. | At TNC, women are just as likely as men to be offered opportunities such as co-authoring a paper or speaking at a conference. | At TNC, the overall culture supports women as much as men to advance their career in conservation/science. | I have experienced sexual harassment at past conferences or important meetings I have attended. | I care for a child/ children/ other family members which can impact on my ability to work fulltime, travel or work outside of hours at short notice. |
|--------|----------------------------|------------------------------------------------------------------------------------------------------------------|-------------------------------------------------------------------------------------------------------------------------------|------------------------------------------------------------------------------------------------------------|-------------------------------------------------------------------------------------------------|------------------------------------------------------------------------------------------------------------------------------------------------------|
|        |                            | Q33                                                                                                              | Q34                                                                                                                           | Q35                                                                                                        | Q36                                                                                             | Q46                                                                                                                                                  |
| Woman  | Agree                      | 56%                                                                                                              | 60%                                                                                                                           | 58%                                                                                                        | 15%                                                                                             | 42%                                                                                                                                                  |
| Woman  | Neither agree nor disagree | 25%                                                                                                              | 29%                                                                                                                           | 26%                                                                                                        | 10%                                                                                             | 8%                                                                                                                                                   |
| Woman  | Disagree                   | 18%                                                                                                              | 10%                                                                                                                           | 16%                                                                                                        | 74%                                                                                             | 48%                                                                                                                                                  |
| Woman  | Don't Know                 | 0%                                                                                                               | 0%                                                                                                                            | 0%                                                                                                         | 0%                                                                                              | 0%                                                                                                                                                   |
| Man    | Agree                      | 71%                                                                                                              | 73%                                                                                                                           | 80%                                                                                                        | 2%                                                                                              | 45%                                                                                                                                                  |
| Man    | Neither agree nor disagree | 23%                                                                                                              | 24%                                                                                                                           | 17%                                                                                                        | 7%                                                                                              | 12%                                                                                                                                                  |
| Man    | Disagree                   | 6%                                                                                                               | 2%                                                                                                                            | 2%                                                                                                         | 90%                                                                                             | 40%                                                                                                                                                  |
| Man    | Don't Know                 | 0%                                                                                                               | 0%                                                                                                                            | 0%                                                                                                         | 0%                                                                                              | 0%                                                                                                                                                   |

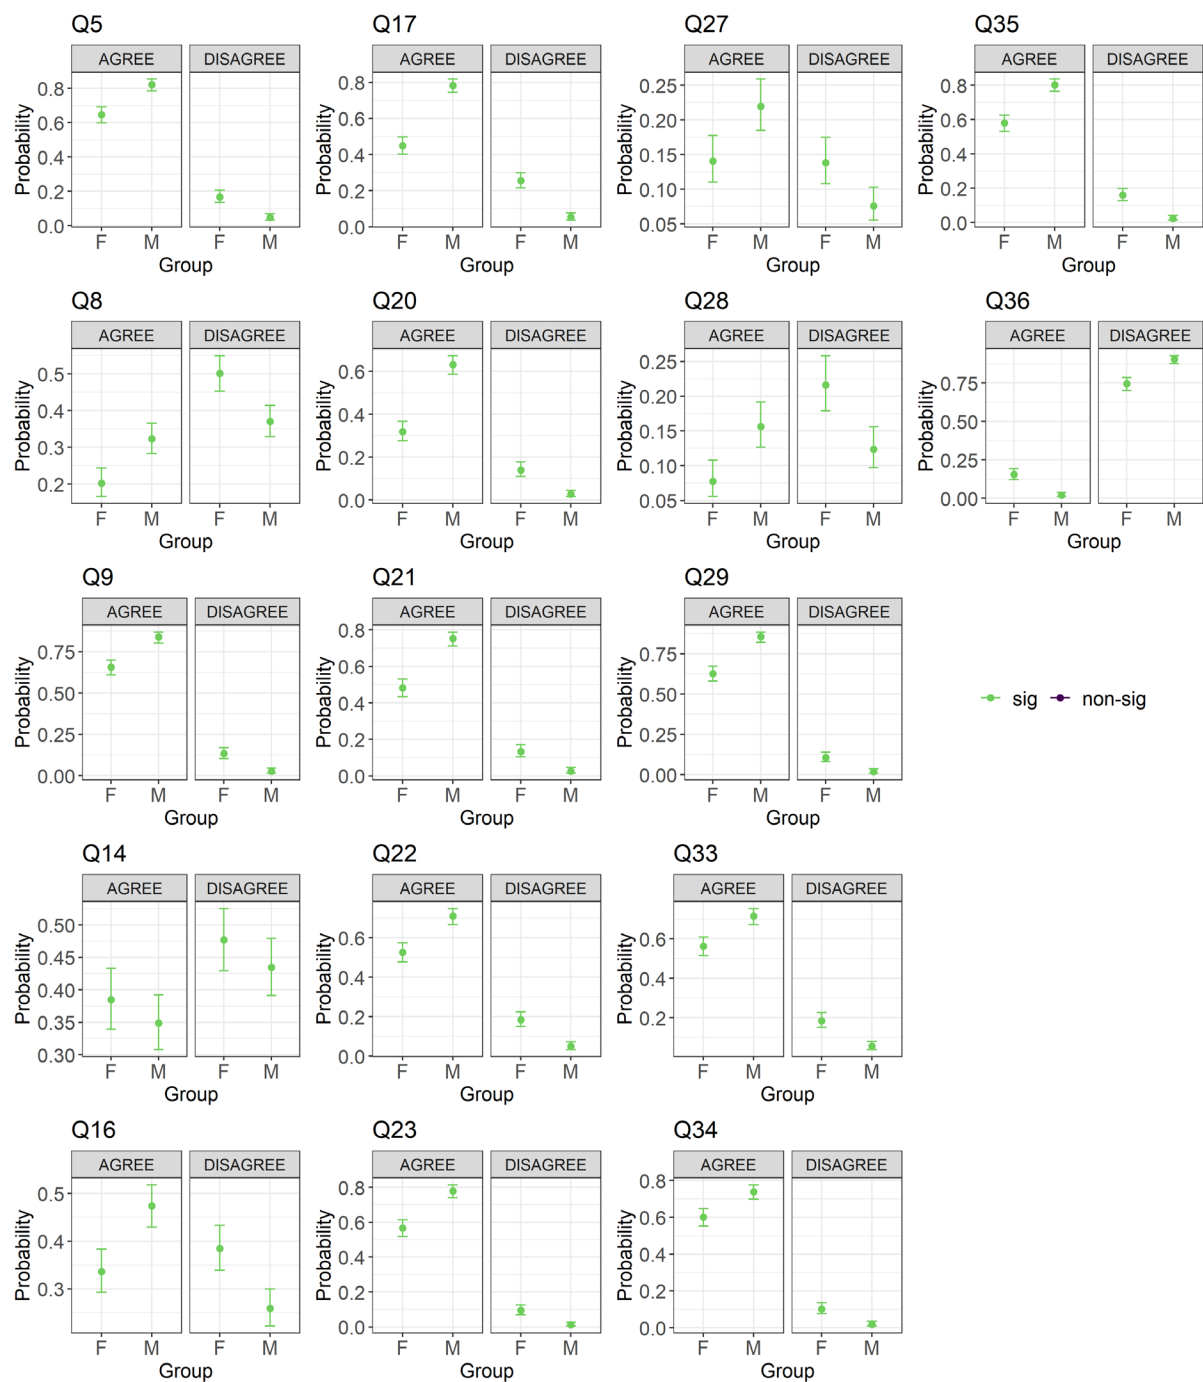

**Figure S1a:** Survey questions where both aggregated 'agree' and 'disagree' response differed significantly between women (F) and men (M).

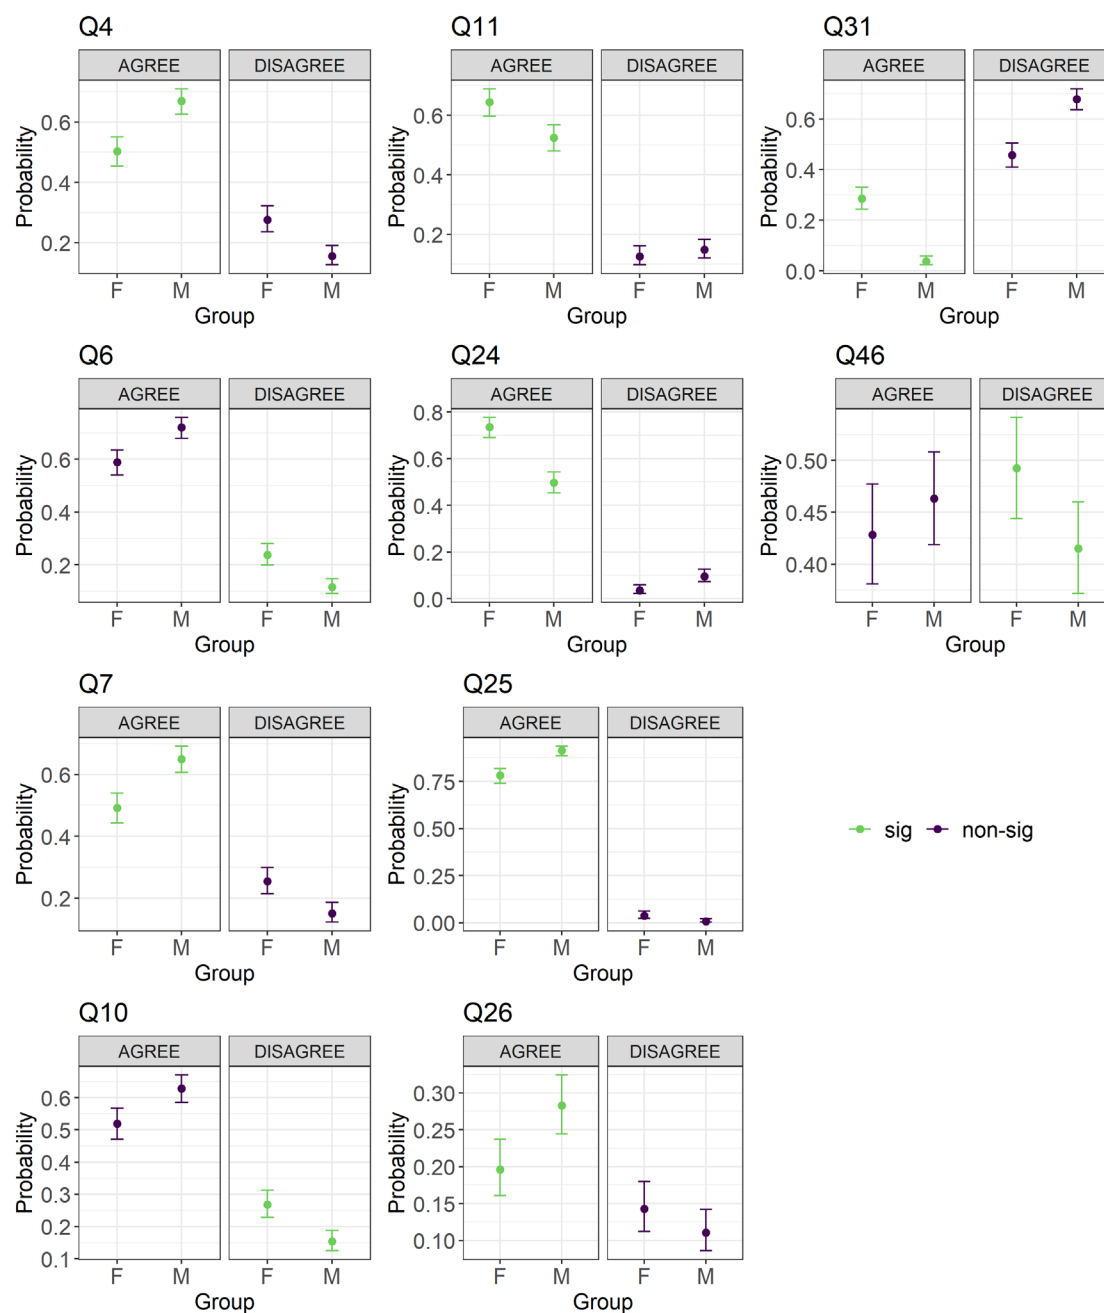

**Figure S1b:** Survey questions where either aggregated 'agree' or 'disagree' response differed significantly between women (F) and men (M).

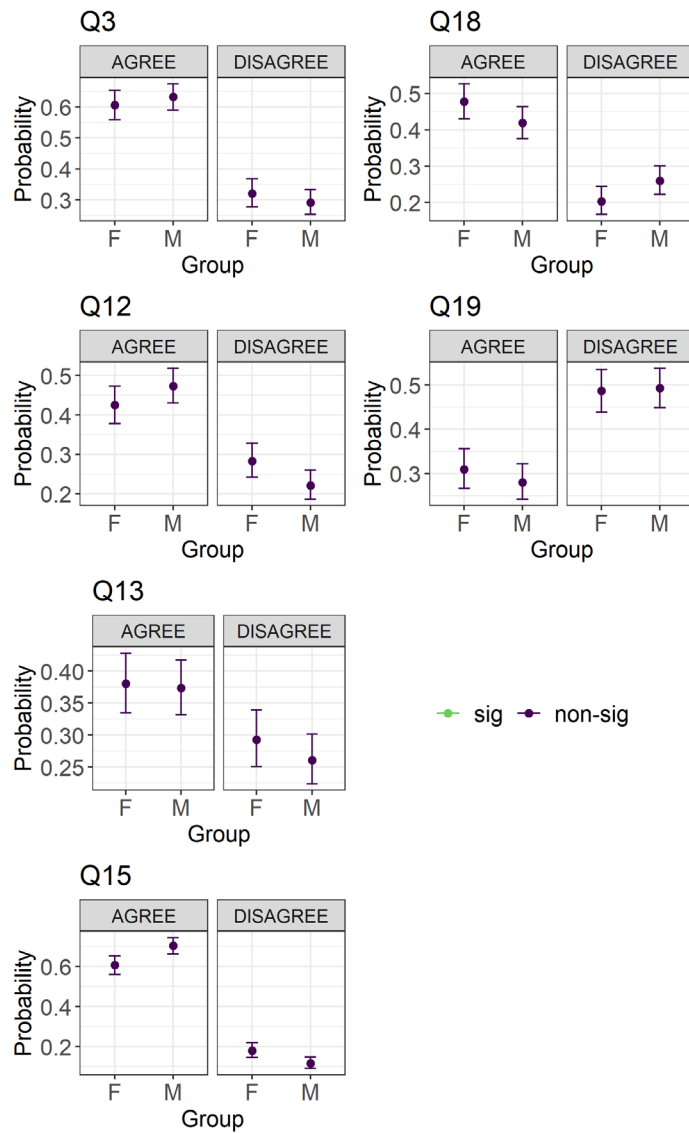

**Figure S1c:** Survey questions where neither aggregated 'agree' nor 'disagree' response differed significantly between women (F) and men (M).
